# Supplementary material for: Daptomycin versus Vancomycin for the Treatment of Methicillin-Resistant Staphylococcus aureus Bloodstream Infection with or without Endocarditis: A Systematic Review and Meta-Analysis
Source: MDPI journal article supplement (doi:10.3390/antibiotics10081014), 2021-08-21
Supplement: s1 [file s1]

**Table S1.** PRISMA 2020 (Preferred Reporting Items for Systematic Review and Meta-Analysis) checklist.

| Section and Topic             | Item # | Checklist item                                                                                                                                                                                                                                                                                       | Reported on page # |
|-------------------------------|--------|------------------------------------------------------------------------------------------------------------------------------------------------------------------------------------------------------------------------------------------------------------------------------------------------------|--------------------|
| <b>TITLE</b>                  |        |                                                                                                                                                                                                                                                                                                      |                    |
| Title                         | 1      | Identify the report as a systematic review.                                                                                                                                                                                                                                                          | 1                  |
| <b>ABSTRACT</b>               |        |                                                                                                                                                                                                                                                                                                      |                    |
| Abstract                      | 2      | See the PRISMA 2020 for Abstracts checklist.                                                                                                                                                                                                                                                         | 2                  |
| <b>INTRODUCTION</b>           |        |                                                                                                                                                                                                                                                                                                      |                    |
| Rationale                     | 3      | Describe the rationale for the review in the context of existing knowledge.                                                                                                                                                                                                                          | 2                  |
| Objectives                    | 4      | Provide an explicit statement of the objective(s) or question(s) the review addresses.                                                                                                                                                                                                               | 2                  |
| <b>METHODS</b>                |        |                                                                                                                                                                                                                                                                                                      |                    |
| Eligibility criteria          | 5      | Specify the inclusion and exclusion criteria for the review and how studies were grouped for the syntheses.                                                                                                                                                                                          | 3-5                |
| Information sources           | 6      | Specify all databases, registers, websites, organisations, reference lists and other sources searched or consulted to identify studies. Specify the date when each source was last searched or consulted.                                                                                            | 3-5, Figure 1      |
| Search strategy               | 7      | Present the full search strategies for all databases, registers and websites, including any filters and limits used.                                                                                                                                                                                 | 3-5, Table S2      |
| Selection process             | 8      | Specify the methods used to decide whether a study met the inclusion criteria of the review, including how many reviewers screened each record and each report retrieved, whether they worked independently, and if applicable, details of automation tools used in the process.                     | 3-5                |
| Data collection process       | 9      | Specify the methods used to collect data from reports, including how many reviewers collected data from each report, whether they worked independently, any processes for obtaining or confirming data from study investigators, and if applicable, details of automation tools used in the process. | 3-5                |
| Data items                    | 10a    | List and define all outcomes for which data were sought. Specify whether all results that were compatible with each outcome domain in each study were sought (e.g. for all measures, time points, analyses), and if not, the methods used to decide which results to collect.                        | 3-5                |
|                               | 10b    | List and define all other variables for which data were sought (e.g. participant and intervention characteristics, funding sources). Describe any assumptions made about any missing or unclear information.                                                                                         | 3-5                |
| Study risk of bias assessment | 11     | Specify the methods used to assess risk of bias in the included studies, including details of the tool(s) used, how many reviewers assessed each study and whether they worked independently, and if applicable, details of automation tools used in the process.                                    | 3-5                |
| Effect measures               | 12     | Specify for each outcome the effect measure(s) (e.g. risk ratio, mean difference) used in the synthesis or presentation of results.                                                                                                                                                                  | 3-5                |
| Synthesis methods             | 13a    | Describe the processes used to decide which studies were eligible for each synthesis (e.g. tabulating the study intervention characteristics and comparing against the planned groups for each synthesis (item #5)).                                                                                 | 3-5                |
|                               | 13b    | Describe any methods required to prepare the data for presentation or synthesis, such as handling of missing summary statistics, or data conversions.                                                                                                                                                | 3-5                |
|                               | 13c    | Describe any methods used to tabulate or visually display results of individual studies and syntheses.                                                                                                                                                                                               | 3-5                |
|                               | 13d    | Describe any methods used to synthesize results and provide a rationale for the choice(s). If meta-analysis was performed, describe the model(s), method(s) to identify the presence and extent of statistical heterogeneity, and software package(s) used.                                          | 3-5                |
|                               | 13e    | Describe any methods used to explore possible causes of heterogeneity among study results (e.g. subgroup analysis, meta-regression).                                                                                                                                                                 | 3-5                |
|                               | 13f    | Describe any sensitivity analyses conducted to assess robustness of the synthesized results.                                                                                                                                                                                                         | 3-5                |
| Reporting bias assessment     | 14     | Describe any methods used to assess risk of bias due to missing results in a synthesis (arising from reporting biases).                                                                                                                                                                              | 3-5                |
| Certainty assessment          | 15     | Describe any methods used to assess certainty (or confidence) in the body of evidence for an outcome.                                                                                                                                                                                                | 3-5                |
| <b>RESULTS</b>                |        |                                                                                                                                                                                                                                                                                                      |                    |
| Study selection               | 16a    | Describe the results of the search and selection process, from the number of records identified in the search to the number of studies included in the review, ideally using a flow diagram.                                                                                                         | 6, Figure 1        |

| Section and Topic                              | Item # | Checklist item                                                                                                                                                                                                                                                                       | Reported on page #             |
|------------------------------------------------|--------|--------------------------------------------------------------------------------------------------------------------------------------------------------------------------------------------------------------------------------------------------------------------------------------|--------------------------------|
|                                                | 16b    | Cite studies that might appear to meet the inclusion criteria, but which were excluded, and explain why they were excluded.                                                                                                                                                          | N/A                            |
| Study characteristics                          | 17     | Cite each included study and present its characteristics.                                                                                                                                                                                                                            | Table 1                        |
| Risk of bias in studies                        | 18     | Present assessments of risk of bias for each included study.                                                                                                                                                                                                                         | 11, Table S3                   |
| Results of individual studies                  | 19     | For all outcomes, present, for each study: (a) summary statistics for each group (where appropriate) and (b) an effect estimate and its precision (e.g. confidence/credible interval), ideally using structured tables or plots.                                                     | Figures 2-5, Table 1, Table S3 |
| Results of syntheses                           | 20a    | For each synthesis, briefly summarise the characteristics and risk of bias among contributing studies.                                                                                                                                                                               | 8-9, Figures 2-5               |
|                                                | 20b    | Present results of all statistical syntheses conducted. If meta-analysis was done, present for each the summary estimate and its precision (e.g. confidence/credible interval) and measures of statistical heterogeneity. If comparing groups, describe the direction of the effect. | 10-17, Figures 2-5             |
|                                                | 20c    | Present results of all investigations of possible causes of heterogeneity among study results.                                                                                                                                                                                       | 16-17, Table S4                |
|                                                | 20d    | Present results of all sensitivity analyses conducted to assess the robustness of the synthesized results.                                                                                                                                                                           | 16-17, Table S5                |
| Reporting biases                               | 21     | Present assessments of risk of bias due to missing results (arising from reporting biases) for each synthesis assessed.                                                                                                                                                              | N/A                            |
| Certainty of evidence                          | 22     | Present assessments of certainty (or confidence) in the body of evidence for each outcome assessed.                                                                                                                                                                                  | 17, Table S6                   |
| <b>DISCUSSION</b>                              |        |                                                                                                                                                                                                                                                                                      |                                |
| Discussion                                     | 23a    | Provide a general interpretation of the results in the context of other evidence.                                                                                                                                                                                                    | 18-20                          |
|                                                | 23b    | Discuss any limitations of the evidence included in the review.                                                                                                                                                                                                                      | 18-20                          |
|                                                | 23c    | Discuss any limitations of the review processes used.                                                                                                                                                                                                                                | 18-20                          |
|                                                | 23d    | Discuss implications of the results for practice, policy, and future research.                                                                                                                                                                                                       | 18-20                          |
| <b>OTHER INFORMATION</b>                       |        |                                                                                                                                                                                                                                                                                      |                                |
| Registration and protocol                      | 24a    | Provide registration information for the review, including register name and registration number, or state that the review was not registered.                                                                                                                                       | 3                              |
|                                                | 24b    | Indicate where the review protocol can be accessed, or state that a protocol was not prepared.                                                                                                                                                                                       | 3                              |
|                                                | 24c    | Describe and explain any amendments to information provided at registration or in the protocol.                                                                                                                                                                                      | N/A                            |
| Support                                        | 25     | Describe sources of financial or non-financial support for the review, and the role of the funders or sponsors in the review.                                                                                                                                                        | 18                             |
| Competing interests                            | 26     | Declare any competing interests of review authors.                                                                                                                                                                                                                                   | 21                             |
| Availability of data, code and other materials | 27     | Report which of the following are publicly available and where they can be found: template data collection forms; data extracted from included studies; data used for all analyses; analytic code; any other materials used in the review.                                           | 21                             |

From: Page MJ, McKenzie JE, Bossuyt PM, Boutron I, Hoffmann TC, Mulrow CD, et al. The PRISMA 2020 statement: an updated guideline for reporting systematic reviews. *BMJ* 2021;372:n71. doi: 10.1136/bmj.n71

**Table S2.** Search strategy through electronic databases.

|                         |                                                                                                                                                                                                                                                                           |
|-------------------------|---------------------------------------------------------------------------------------------------------------------------------------------------------------------------------------------------------------------------------------------------------------------------|
| <b>MEDLINE</b>          | "Daptomycin"[Text Word] AND "Vancomycin"[Text Word] AND ("aureus"[Text Word] OR "MRSA"[Text Word] OR "S. aureus"[Text Word] OR "Staphylococcus aureus"[Text Word] OR "S. aureus"[Text Word] OR "methicillin-resistance"[Text Word] OR "methicillin-resistant"[Text Word]) |
| <b>EMBASE</b>           | 'daptomycin':ti,ab,kw AND 'vancomycin':ti,ab,kw AND ('aureus':ti,ab,kw OR 'mrsa':ti,ab,kw OR 'staphylococcus aureus':ti,ab,kw OR 's. aureus':ti,ab,kw OR 'methicillin-resistance':ti,ab,kw OR 'methicillin-resistant':ti,ab,kw)                                           |
| <b>COCHRANE LIBRARY</b> | "Daptomycin" and "staphylococcus aureus"                                                                                                                                                                                                                                  |

**Table S3. (a).** Quality assessment of studies through a modified version of the Newcastle-Ottawa Assessment Scale.

| <b>Cohort studies</b>       |                                                     |                                                                           |                              |                                                |                                                       |                               |                                                               |                             |                                          |
|-----------------------------|-----------------------------------------------------|---------------------------------------------------------------------------|------------------------------|------------------------------------------------|-------------------------------------------------------|-------------------------------|---------------------------------------------------------------|-----------------------------|------------------------------------------|
| <b>Study</b>                | <b>SELECTION<br/>MAX 4</b>                          |                                                                           |                              |                                                | <b>COMPARABILITY<br/>MAX 2</b>                        | <b>OUTCOME<br/>MAX 3</b>      |                                                               |                             | <b>TOTAL<br/>STAR RATING<br/>UP TO 9</b> |
|                             | Representative-<br>ness<br>of the<br>exposed cohort | Selection<br>of the<br>non-exposed<br>cohort                              | Ascertainment<br>of exposure | Outcome<br>not present<br>at start of<br>study | Comparability of co-<br>horts at baseline             | Assess-<br>ment of<br>outcome | Follow-<br>up long<br>enough                                  | Follow-<br>up com-<br>plete | Assessment<br>of<br>bias risk            |
| Rehm et al.                 | ★                                                   | ★                                                                         | ★                            | ★                                              | ★ ★                                                   | ★                             | ★                                                             | ★                           | 9 Low risk of bias                       |
| Murray et al.               | ★                                                   | ★                                                                         | ★                            | ★                                              | ★                                                     | ★                             | ★                                                             | ★                           | 8 Low risk of bias                       |
| Weston et al.               | ★                                                   | ★                                                                         | ★                            | ★                                              | ★ ★                                                   | ★                             | ★                                                             | ★                           | 9 Low risk of bias                       |
| Usery et al.                | ★                                                   | ★                                                                         | ★                            | ★                                              | ★                                                     | ★                             | ★                                                             | ★                           | 8 Moderate <sup>a</sup> risk of bias     |
| Moise et al.                | ★                                                   | ★                                                                         | ★                            | ★                                              | ★                                                     | ★                             | ★                                                             | ★                           | 8 Low risk of bias                       |
| Claeys et al.               | ★                                                   | ★                                                                         | ★                            | ★                                              | ★                                                     | ★                             | ★                                                             | ★                           | 8 Low risk of bias                       |
| Arshad et al.               | ★                                                   | ★                                                                         | ★                            | ★                                              | ★ ★                                                   | ★                             | ★                                                             | ★                           | 9 Moderate <sup>b</sup> risk of bias     |
| <b>Case-control studies</b> |                                                     |                                                                           |                              |                                                |                                                       |                               |                                                               |                             |                                          |
| <b>Study</b>                | <b>SELECTION<br/>MAX 4</b>                          |                                                                           |                              |                                                | <b>COMPARABILITY<br/>MAX 2</b>                        | <b>OUTCOME<br/>MAX 3</b>      |                                                               |                             | <b>TOTAL<br/>STAR RATING<br/>UP TO 9</b> |
|                             | Adequacy of case<br>definition                      | Cases<br>representative<br>of the<br>population<br>under<br>investigation | Selection of<br>the controls | Selection<br>of the<br>controls                | Comparability of<br>cases and controls at<br>baseline | Assessme<br>nt of<br>exposure | Same<br>method<br>to<br>ascertain<br>cases<br>and<br>controls | Missing<br>rate             | Assessment<br>of<br>bias risk            |
| Moore et al.                | ★                                                   | ★                                                                         | ★                            | ★                                              | ★                                                     | ★                             | ★                                                             |                             | 9 Low risk of bias                       |

<sup>a</sup> Downgrade due to study design, originally conceived to compare more groups of antibiotics.

<sup>b</sup> Downgrade due to study design, originally conceived to compare ceftaroline with other antibiotics.

**Table S3. (b).** Definition for the adapted version of the Newcastle-Ottawa Assessment Scale used to the purposes of the present review.

| Cohort studies          |                                                                                 | Criteria to fulfill                                                                                                                                                                                                        |
|-------------------------|---------------------------------------------------------------------------------|----------------------------------------------------------------------------------------------------------------------------------------------------------------------------------------------------------------------------|
| Category: Selection     | Representativeness of the exposed cohort                                        | Cases of MRSA BSI/endocarditis exposed to daptomycin                                                                                                                                                                       |
|                         | Selection of the non exposed cohort                                             | Cases of MRSA BSI/endocarditis exposed to vancomycin drawn from the same population of the exposed to daptomycin                                                                                                           |
|                         | Assessment of exposure                                                          | Secure records                                                                                                                                                                                                             |
|                         | Demonstration that the outcomes of interest were not present at the study start | Yes                                                                                                                                                                                                                        |
| Category: Comparability | Comparability of cohorts on the basis of design or analysis                     | If propensity score matching: two stars                                                                                                                                                                                    |
|                         |                                                                                 | Other matching methods involving at least criteria among age, severity of illness (e.g. Pitt Score), comorbidity burden (e.g. Charlson Score Index): one star; alternatively, overlapping baseline features between groups |
| Category: Outcome       | Assessment of outcome                                                           | Prospective collection of data or record linkage                                                                                                                                                                           |
|                         | Long enough follow-up                                                           | At least 30 day                                                                                                                                                                                                            |
|                         | Adequacy of follow-up                                                           | Complete data for all subjects accounted for or limited loss to follow-up (maximum)                                                                                                                                        |
| Case-control studies    |                                                                                 |                                                                                                                                                                                                                            |
| Category: Selection     | Adequacy of case definition                                                     | MRSA BSI according to international definitions                                                                                                                                                                            |
|                         | Representativeness of the cases                                                 | Consecutive or obviously representative series of cases                                                                                                                                                                    |
|                         | Selection of the controls                                                       | Controls from the same population of cases                                                                                                                                                                                 |
|                         | Definition of controls                                                          | Subjects with MRSA BSI/endocarditis receiving vancomycin                                                                                                                                                                   |
| Category: Comparability | Comparability of cases and controls on the basis of design or analysis          | Study controls for age and severity of illness (e.g. Pitt Score): one star                                                                                                                                                 |
|                         |                                                                                 | Study controls for any additional factor (e.g., comorbidity burden): another star                                                                                                                                          |
| Category: Exposure      | Ascertainment of exposure                                                       | Secure records                                                                                                                                                                                                             |
|                         | Same method of ascertainment for cases and controls                             | Yes                                                                                                                                                                                                                        |
|                         | Missing rate                                                                    | Same for both groups                                                                                                                                                                                                       |

BSI: bloodstream infection; MRSA: methicillin-resistant *Staphylococcus aureus*. Note: A study can be awarded a maximum of one star for each item as for the Selection and Outcome categories; a maximum of two stars can be given for Comparability.

**Table S4.** Results of subgroup analyses (mortality as outcome).

|                         | Included studies | Sample size | OR, 95% CI       | I <sup>2</sup> | Subgroup difference |
|-------------------------|------------------|-------------|------------------|----------------|---------------------|
| Study quality           |                  |             |                  |                |                     |
| • Moderate risk of bias | 2                | 209         | 2.45 (1.11-5.40) | 0%             | p = 0.001           |
| • Low risk of bias      | 6                | 1017        | 0.51 (0.30-0.86) | 45%            |                     |
| Endocarditis proportion |                  |             |                  |                |                     |
| • ≤ 20%                 | 4                | 689         | 0.65 (0.31-1.38) | 65%            | p = 0.76            |
| • > 20%                 | 4                | 537         | 0.81 (0.27-2.39) | 75%            |                     |
| Study mortality         |                  |             |                  |                |                     |
| • ≤ 15%                 | 3                | 539         | 0.59, 0.16-2.13  | 76%            | p = 0.66            |
| • > 15%                 | 5                | 687         | 0.82, 0.39-1.70  | 67%            |                     |
| Combination therapy     |                  |             |                  |                |                     |
| • Yes*                  | 6                | 1017        | 0.51 (0.30-0.86) | 45%            | p = 0.001           |
| • No                    | 2                | 209         | 2.45 (1.11-5.40) | 0%             |                     |

\* When excluding the study by Rehm et al. [26], OR was 0.44 (95% CI. 0.29-0.66), I<sup>2</sup> equal to 12%, 929 the sample size, and statistically significant the test for interaction (p = 0.0001).CI: confidence interval; OR: odds ratio.

**Table S5.** Results of leave-one-out meta-analysis (random-effects model).

| Outcome: mortality          |                          |                                    |
|-----------------------------|--------------------------|------------------------------------|
| Study excluded              | Pooled OR (95% CI)       | Heterogeneity (I <sup>2</sup> ), % |
| Rehm et al.                 | 0.65 (0.34-1.24)         | 67                                 |
| Moore et al.                | 0.80 (0.41-1.56)         | 69                                 |
| Murray et al.               | 0.82 (0.44-1.54)         | 68                                 |
| Weston et al.               | 0.82 (0.42-1.59)         | 67                                 |
| Usery et al.                | 0.63 (0.34-1.16)         | 64                                 |
| Claeys et al.               | 0.81 (0.42-1.59)         | 67                                 |
| Moise et al.                | 0.72 (0.35-1.49)         | 71                                 |
| Arshad et al.               | 0.61 (0.34-1.09)         | 59                                 |
| Outcome: clinical failure   |                          |                                    |
| Study excluded              | Pooled OR (95% CI)       | Heterogeneity (I <sup>2</sup> ), % |
| Rehm et al.                 | 0.58 (0.36-0.94)         | 65                                 |
| Moore et al.                | 0.61 (0.37-0.98)         | 65                                 |
| Murray et al.               | 0.65 (0.42-0.99)         | 52                                 |
| Weston et al.               | 0.59 (0.36-0.98)         | 65                                 |
| Usery et al.                | 0.53 (0.34-0.81)         | 57                                 |
| Claeys et al.               | 0.60 (0.36-1.02)         | 65                                 |
| Moise et al.                | 0.61 (0.38-0.98)         | 64                                 |
| Arshad et al.               | 0.48 (0.35-0.65)         | 19                                 |
| Outcome: recurrence         |                          |                                    |
| Study excluded              | Pooled OR (95% CI)       | Heterogeneity (I <sup>2</sup> ), % |
| Rehm et al.                 | 0.89 (0.38-2.12)         | 22                                 |
| Moore et al.                | 1.11 (0.52-2.35)         | 21                                 |
| Murray et al.               | 1.12 (0.64-2.13)         | 0                                  |
| Weston et al.               | 0.83 (0.43-1.62)         | 0                                  |
| Usery et al.                | 1.29 (0.66-1.25)         | 2                                  |
| Moise et al.                | 1.06 (0.56-1.98)         | 9                                  |
| Arshad et al.               | 1.00 (0.49-2.01)         | 27                                 |
| Outcome: persistent BSI     |                          |                                    |
| Study excluded              | Pooled OR (95% CI)       | Heterogeneity (I <sup>2</sup> ), % |
| Rehm et al.                 | 0.71 (0.36-1.42)         | 72                                 |
| Murray et al.               | 0.96 (0.51-1.81)         | 61                                 |
| Weston et al.               | 0.83 (0.40-1.76)         | 75                                 |
| Usery et al.                | 0.62 (0.36-1.06)         | 51                                 |
| Claeys et al.               | 0.91 (0.42-1.94)         | 72                                 |
| Moise et al.                | 0.73 (0.37-1.47)         | 74                                 |
| Outcome: LOS                |                          |                                    |
| Study excluded              | Mean difference (95% CI) | Heterogeneity (I <sup>2</sup> ), % |
| Murray et al.               | 1.48 (-0.66, 3.63)       | 17                                 |
| Usery et al.                | 0.79 (-1.00, 2.59)       | 36                                 |
| Claeys et al.               | 0.03 (-1.70, 1.76)       | 0                                  |
| Moise et al.                | 1.32 (-0.67, 3.30)       | 26                                 |
| Outcome: Safety             |                          |                                    |
| Study excluded              | Pooled OR (95% CI)       | Heterogeneity (I <sup>2</sup> ), % |
| Rehm et al.                 | 0.37 (0.09-1.52)         | 0                                  |
| Moore et al.                | 0.14 (0.02-1.01)         | 31                                 |
| Murray et al.               | 0.03 (0.00-0.26)         | 0                                  |
| Claeys et al.               | 0.23 (0.06-0.84)         | 32                                 |
| Moise et al.                | 0.09 (0.01-1.57)         | 37                                 |
| Outcome: 30-day readmission |                          |                                    |
| Study excluded              | Pooled OR (95% CI)       | Heterogeneity (I <sup>2</sup> ), % |
| Murray et al.               | 1.01 (0.58-2.06)         | 0                                  |
| Moise et al.                | 0.87 (0.44-1.71)         | 0                                  |
| Arshad et al.               | 0.94 (0.56-1.55)         | 0                                  |

BSI: bloodstream infection; CI: confidence interval; LOS: length of stay; OR: odds ratio.

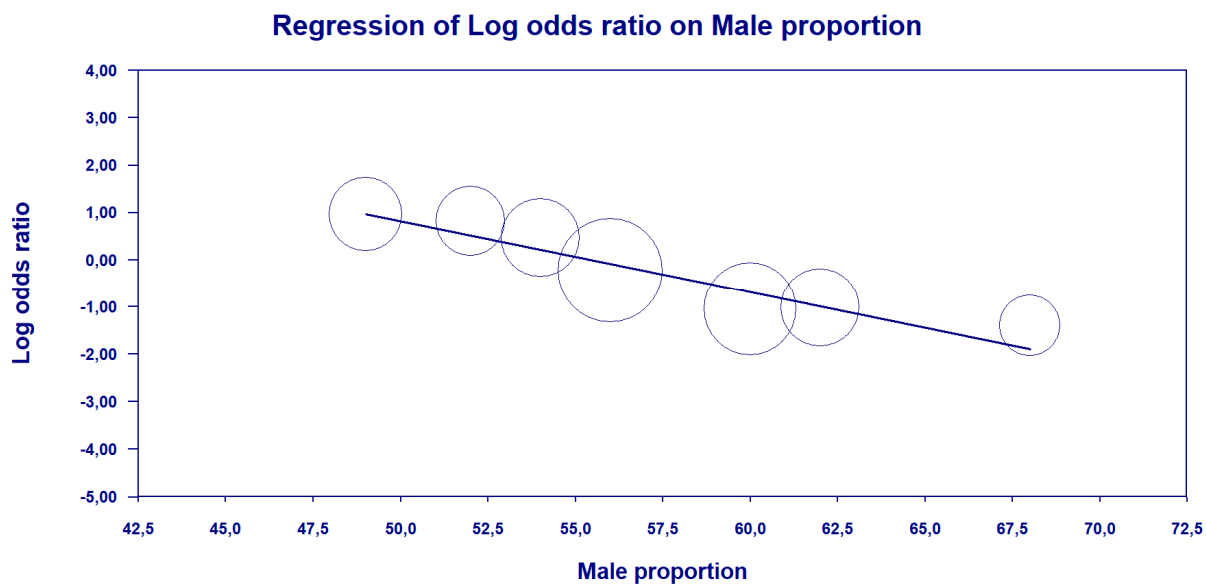

**Figure S1.** Bubble plot displaying the result of the meta-regression.

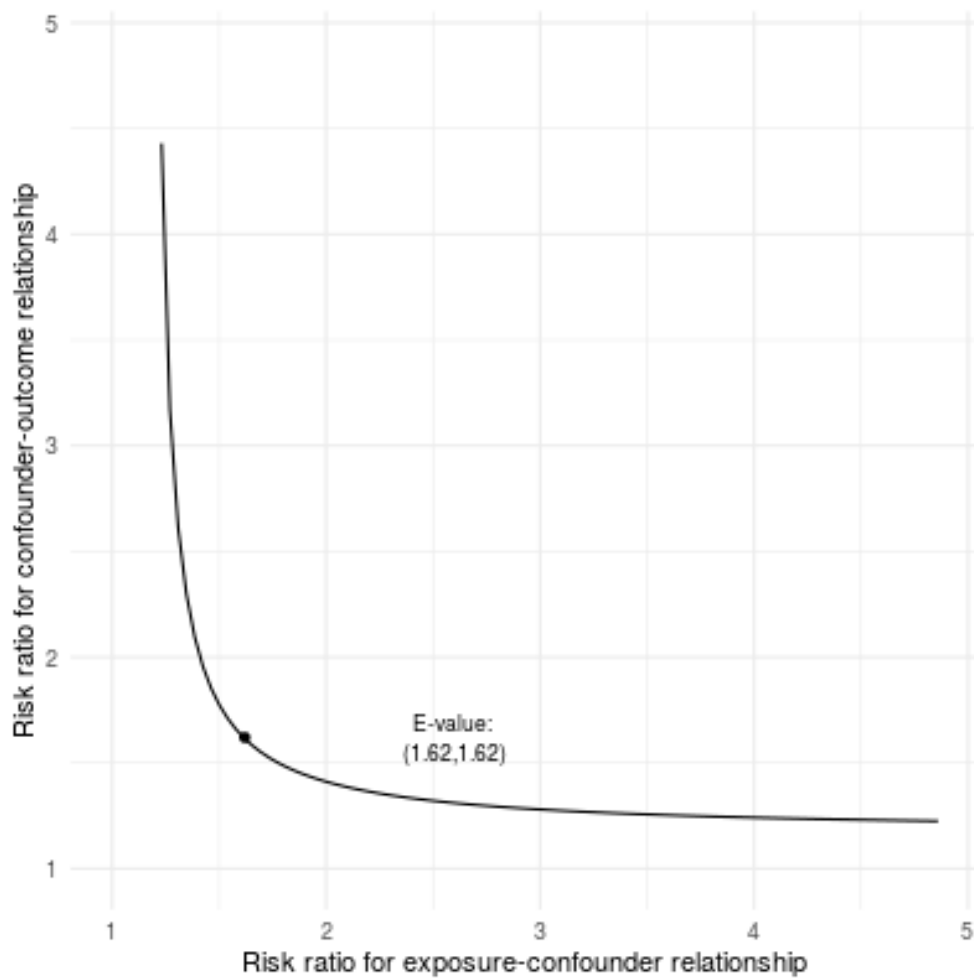

**Figure S2.** E-value plot.

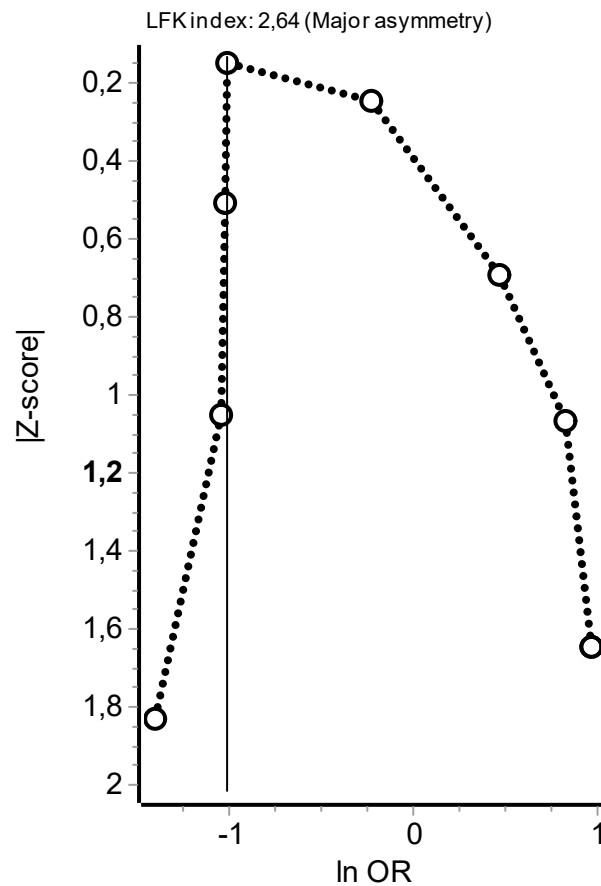

LFK: Luis Furuya-Kanamori.

**Figure S3.** Doi plot analysis and LFK index of publication bias.

**Table S6.** Certainty of evidence according to the GRADE framework.

| Outcome          | No of studies | Risk of Bias | Inconsistency | Indirectness | Imprecision | Publication bias | Certainty of evidence |
|------------------|---------------|--------------|---------------|--------------|-------------|------------------|-----------------------|
| Mortality        | 8             | Not serious  | Serious       | Not serious  | Not serious | Serious          | Low                   |
| Clinical failure | 10            | Not serious  | Serious       | Not serious  | Not serious | Serious          | Low                   |
| Relapse          | 7             | Not serious  | Not serious   | Not serious  | Serious     | Serious          | Low                   |
| Persistence      | 6             | Not serious  | Serious       | Not serious  | Serious     | Serious          | Very low              |
| Length of stay   | 4             | Not serious  | Not serious   | Not serious  | Serious     | Serious          | Low                   |
| Safety profile   | 5             | Not serious  | Not serious   | Not serious  | Not serious | Serious          | Moderate              |
| Re-admission     | 3             | Not serious  | Not serious   | Not serious  | Serious     | Serious          | Low                   |

Grade Definitions about certainty of evidence.

High: Further research is very unlikely to change our confidence in the estimate of effect.

Moderate: Further research is likely to have an important impact on our confidence in the estimate of effect and may change the estimate.

Low: Further research is very likely to have an important impact on our confidence in the estimate of effect and is likely to change the estimate.

Very low: Any estimate of effect is very uncertain.
